# Supplementary material for: Facile synthesis, characterization and DFT studies of a nanostructured nickel–molybdenum–phosphorous planar electrode as an active electrocatalyst for the hydrogen evolution reaction
Source: Royal Society of Chemistry journal article supplement (doi:10.1039/c8nr08039a), 2019-01-01
Supplement: c8nr08039a1.pdf [file c8nr08039a1.pdf]

**Electronic Supplementary Information (ESI)**

**Facile Synthesis, Characterization and DFT Studies of Nanostructured Nickel – Molybdenum - Phosphorous Planar Electrodes as Active Electrocatalyst for Hydrogen Evolution Reaction**

Wenjuan Zhang,<sup>a</sup> Jian Zheng,<sup>\*c</sup> Xundi Gu,<sup>a</sup> Bin Tang,<sup>a</sup> Jinping Li,<sup>\*b</sup>

and Xiaoguang Wang <sup>\*a,b</sup>

<sup>a</sup> *Laboratory of Advanced Materials and Energy Electrochemistry, Research Institute of Surface Engineering, Taiyuan University of Technology, Taiyuan, 030024, China. E-mail: wangxiaog1982@163.com; wangxiaoguang@tyut.edu.cn (X.W.).*

<sup>b</sup> *Shanxi Key Laboratory of Gas Energy Efficient and Clean Utilization, Taiyuan, 030024, China. E-mail: jpli211@hotmail.com (J.L.).*

<sup>c</sup> *Advanced Development Department, TTM Technologies China Ltd., Guangzhou, 510555, China. E-mail: candle200126@gmail.com (J.Z.).*

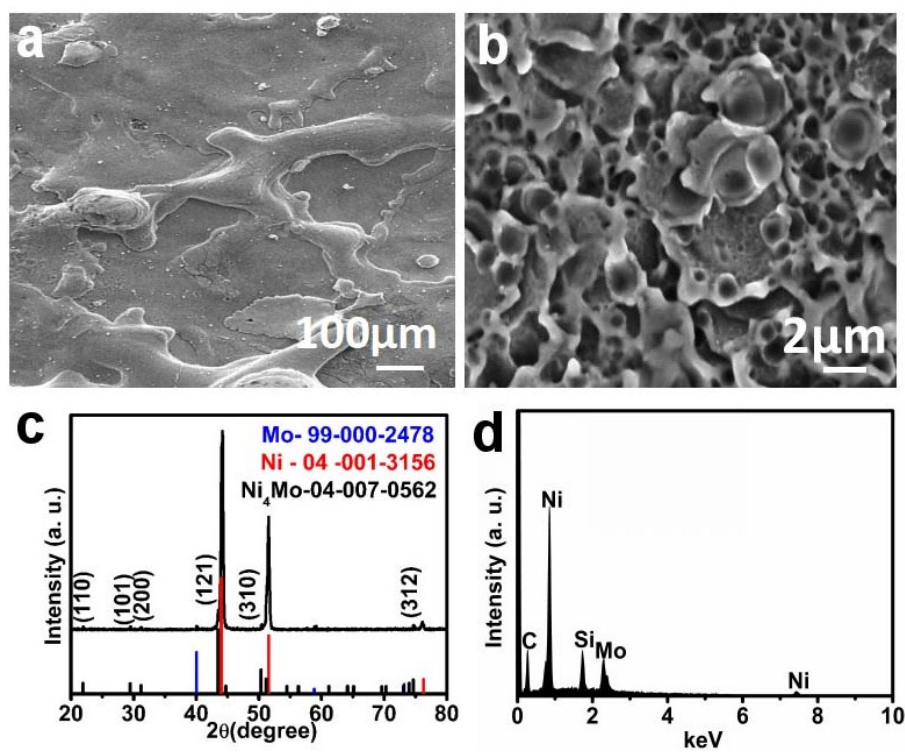

**Fig. S1** (a) Low- and (b) high-magnification SEM images of Ni@Ni-Mo.  
(c) Surface XRD pattern and (d) EDX spectrum.

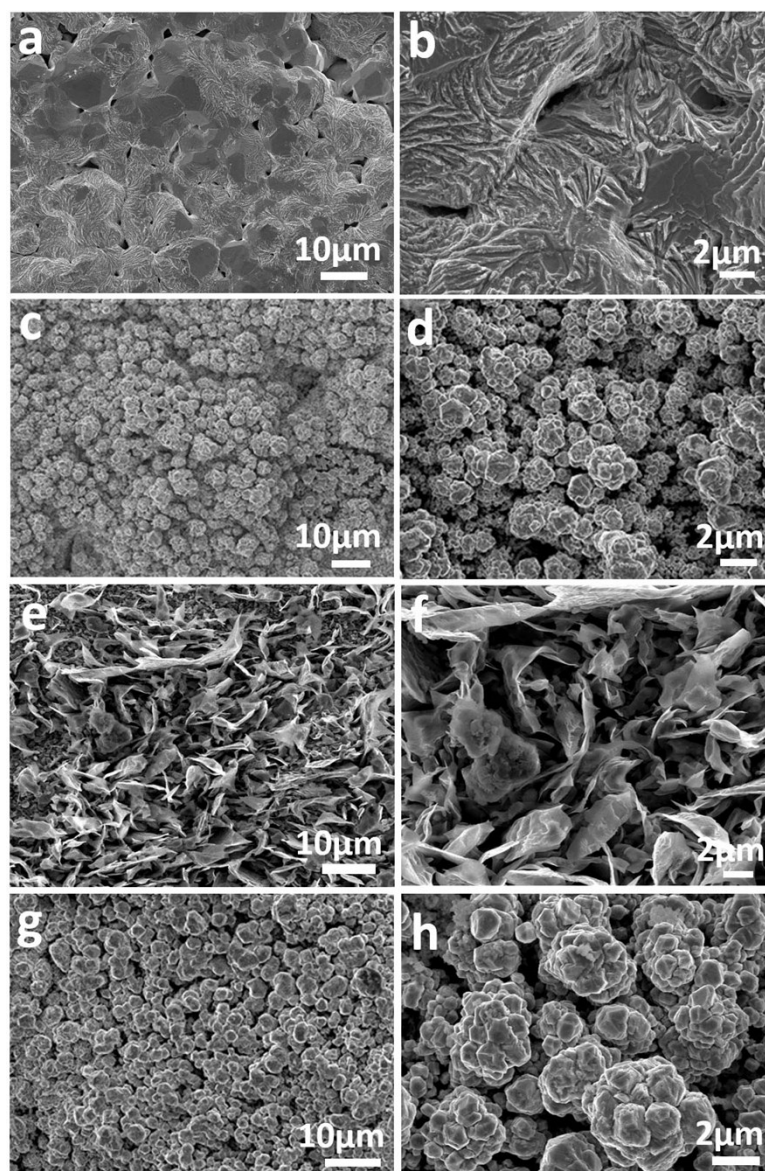

**Fig. S2** SEM images of the samples prepared at (a,b) 500°C, (c,d) 600°C, (e,f) 700°C and (g,h) 800°C.

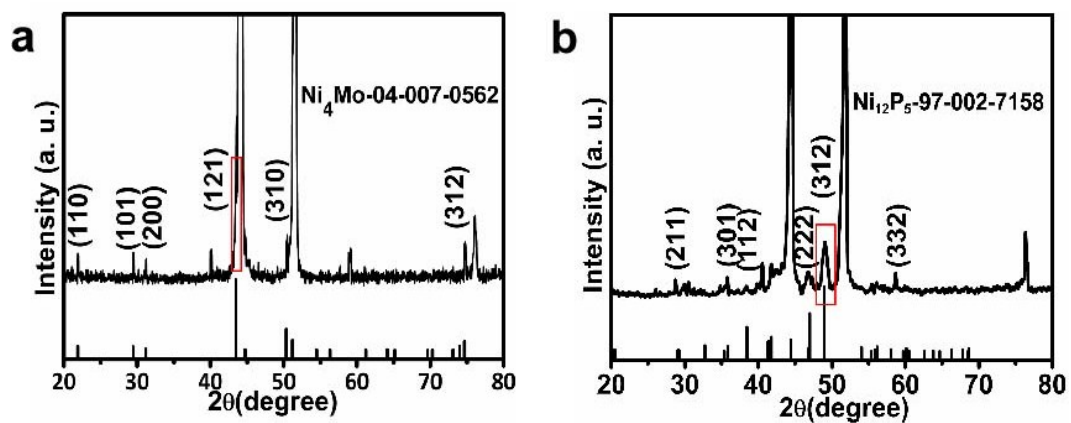

**Fig. S3** XRD patterns of (a)  $\text{Ni}_4\text{Mo}$  and (b)  $\text{Ni}_{12}\text{P}_5$ .

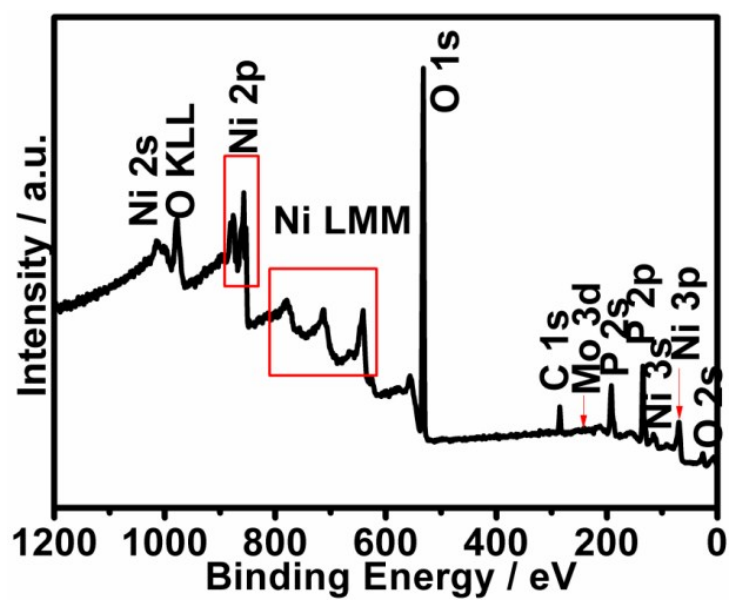

**Fig. S4** XPS survey of Ni-Mo-P surface.

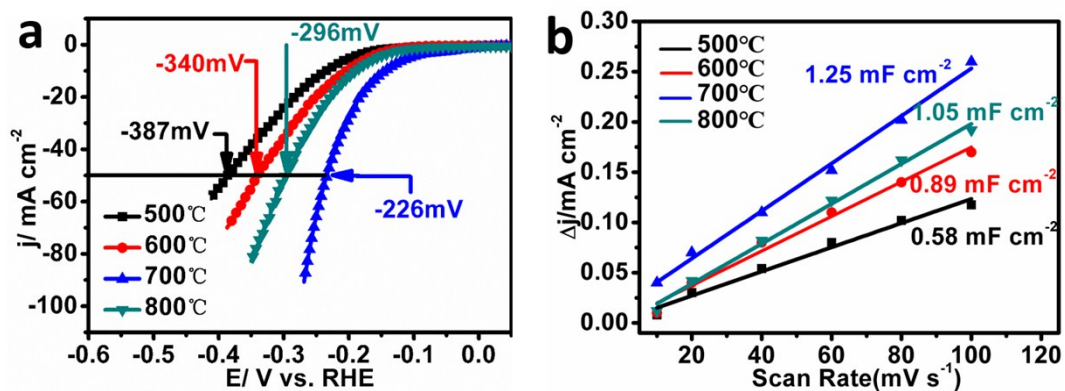

**Fig. S5** (a) Polarization curves of the Ni-Mo-P electrodes synthesized at different phosphorization temperature in 1.0 M KOH solution with a scan rate of 10 mV s<sup>-1</sup>. (b) The capacitive current densities at 0.075 V as a function of scan rate for Ni-Mo-P synthesized at different temperature.

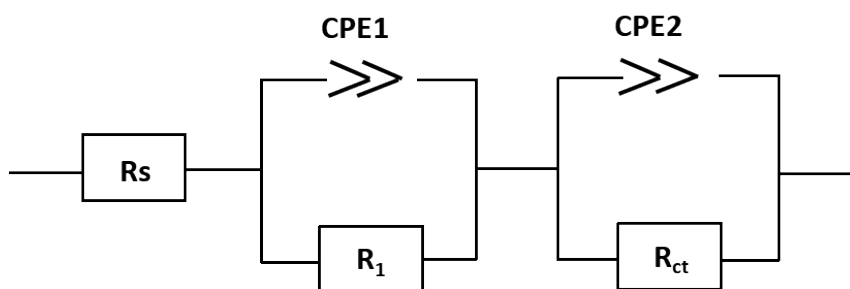

**Fig. S6** The equivalent circuit model used to fit the Nyquist plots.

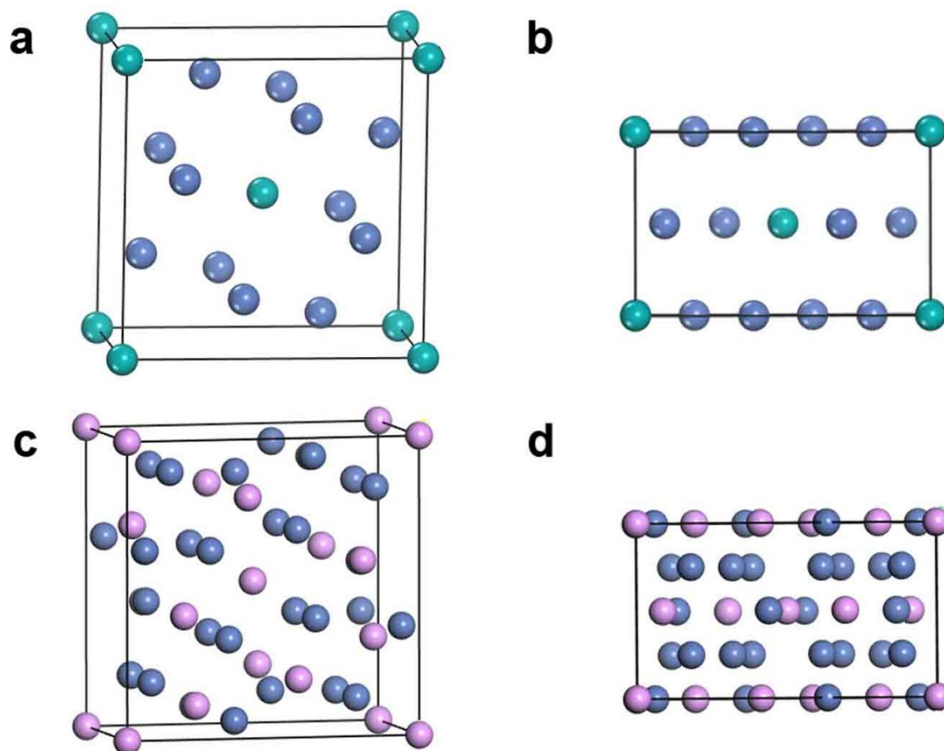

**Fig. S7** (a) Side and (b) top views of the optimized structure of  $\text{Ni}_4\text{Mo}$  ( $a = b = 5.725 \text{ \AA}$ ,  $c = 3.559 \text{ \AA}$ ). (c) Side and (d) top views of the optimized structure of  $\text{Ni}_{12}\text{P}_5$  ( $a = b = 8.629 \text{ \AA}$ ,  $c = 5.036 \text{ \AA}$ ). Ni atoms: blue, Mo atoms: tawny brown, P atoms: purple.



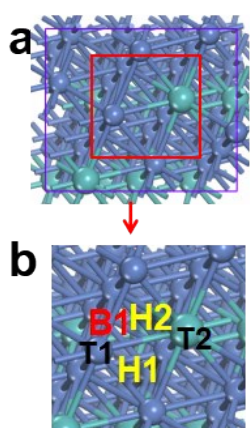

**Table S1 Adsorption Energy on Ni<sub>4</sub>Mo(101) facet**

| position | adsorption energy (eV) | d (Ni-H) (Å) | d (Mo- H) (Å) |
|----------|------------------------|--------------|---------------|
| T1       | -0.761                 |              | 1.695         |
| T2       | -0.426                 | 1.605        |               |
| B1       | -0.753                 | 1.613        | 1.714         |
| H1       | -0.391                 | 1.513 1.764  | 1.734         |

**Fig. S8** (a) top-down view of the Ni<sub>4</sub>Mo (101) and (b) possible adsorption sites of corresponding surface. Table S1. Adsorption energies and structure parameters for the hydrogen adsorption onto 5 Layer of Ni<sub>4</sub>Mo (101). The preferable adsorption sites were highlighted with red rectangle. All the following discussions have the similar highlight.

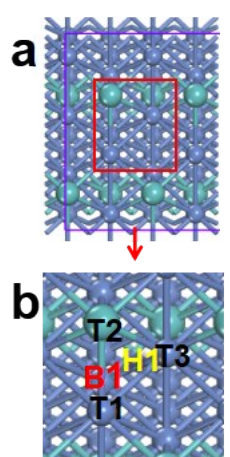

**Table S2 Adsorption Energy on Ni<sub>4</sub>Mo(110) facet**

| position | adsorption energy (eV) | d (Ni-H) (Å) | d (Mo- H) (Å) |
|----------|------------------------|--------------|---------------|
| T1       | -0.542                 | 1.641        |               |
| T2       | -0.239                 | 1.751        |               |
| T3       | -0.506                 | 1.953        |               |
| B1       | -0.552                 | 1.607        | 1.940         |
| H1       | -0.459                 | 1.659        | 1.983         |

**Fig. S9** (a) top-down view of the Ni<sub>4</sub>Mo (110) and (b) possible adsorption sites of corresponding surface. Table S2. Adsorption energies and structure parameters for the hydrogen adsorption onto 5 Layer of Ni<sub>4</sub>Mo (110).

|   |                                                                                   |                        |              |              |
|---|-----------------------------------------------------------------------------------|------------------------|--------------|--------------|
| a | Table S3 Adsorption Energy on Ni <sub>4</sub> Mo(310) facet                       |                        |              |              |
|   | 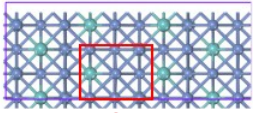 |                        |              |              |
| b |  |                        |              |              |
|   | position                                                                          | adsorption energy (eV) | d (Ni-H) (Å) | d (Mo-H) (Å) |
|   | T1                                                                                | -0.465                 | 1.698        | 1.593        |
|   | T2                                                                                | -0.961                 | 1.727        |              |
|   | B1                                                                                | -0.747                 | 1.563        | 1.863        |
|   | B2                                                                                | -0.478                 | 1.681        | 1.598        |

**Fig. S10** (a) top-down view of the Ni<sub>4</sub>Mo (310) and (b) possible adsorption sites of corresponding surface. Table S3. Adsorption energies and structure parameters for the hydrogen adsorption onto 5 Layer of Ni<sub>4</sub>Mo (310).

|   |                                                                                     |                        |              |              |
|---|-------------------------------------------------------------------------------------|------------------------|--------------|--------------|
| a | Table S4 Adsorption Energy on Ni <sub>4</sub> Mo(312) facet                         |                        |              |              |
|   | 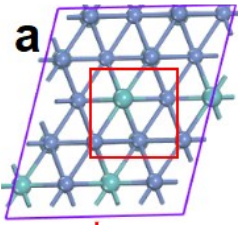 |                        |              |              |
| b |  |                        |              |              |
|   | position                                                                            | adsorption energy (eV) | d (Ni-H) (Å) | d (Mo-H) (Å) |
|   | T1                                                                                  | -0.550                 | 1.690        | 1.838        |
|   | T2                                                                                  | -0.714                 | 1.646        | 1.883        |
|   | B1                                                                                  | -0.713                 | 1.661        | 1.873        |
|   | H1                                                                                  | -0.886                 | 1.668        | 1.873        |

**Fig. S11** (a) top-down view of the Ni<sub>4</sub>Mo (312) and (b) possible adsorption sites of corresponding surface. Table S4. Adsorption energies and structure parameters for the hydrogen adsorption onto 5 Layer of Ni<sub>4</sub>Mo (312).



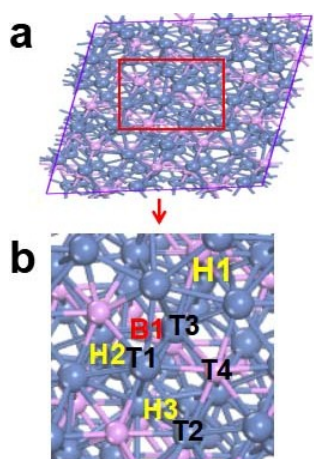

**Table S5 Adsorption Energy on Ni<sub>12</sub>P<sub>5</sub>(312) facet**

| position | adsorption energy (eV) | d (Ni-H) (Å) | d (P- H) (Å) |
|----------|------------------------|--------------|--------------|
| T1       | -0.659                 | 1.618        | 1.665        |
| T2       | -0.423                 | 1.628        | 1.628        |
| T3       | -0.581                 | 1.620        | 1.663        |
| T4       | -0.763                 | 1.838        | 1.621        |
| B1       | -0.643                 | 1.610        | 1.664        |
| H1       | -1.035                 | 1.624        | 1.443 1.652  |
| H2       | -0.649                 | 1.648        | 1.613 1.817  |
| H3       | -0.595                 | 1.645        | 1.687 1.698  |

**Fig. S12** (a) top-down view of the Ni<sub>12</sub>P<sub>5</sub> (312) and (b) possible adsorption sites of corresponding surface. Table S5. Adsorption energies and structure parameters for the hydrogen adsorption onto 5 Layer of Ni<sub>12</sub>P<sub>5</sub> (312).

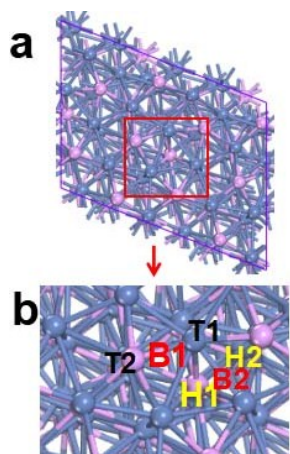

**Table S6 Adsorption Energy on Ni<sub>12</sub>P<sub>5</sub>(211) facet**

| position | adsorption energy (eV) | d (Ni-H) (Å) | d (P- H) (Å) |
|----------|------------------------|--------------|--------------|
| T1       | 0.555                  | 1.504        |              |
| T2       | -0.167                 |              | 1.430        |
| B1       | -0.042                 | 1.670        | 1.564        |
| B2       | -0.076                 | 1.704        | 1.760        |
| H1       | -0.136                 | 1.685        | 1.691 1.751  |
| H2       | 0.049                  | 1.647        | 1.652 1.811  |

**Fig. S13** (a) top-down view of the Ni<sub>12</sub>P<sub>5</sub> (211) and (b) possible adsorption sites of corresponding surface. Table S6. Adsorption energies and structure parameters for the hydrogen adsorption onto 5 Layer of Ni<sub>12</sub>P<sub>5</sub> (211).

**a**

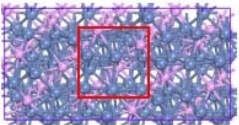

**b**



**Table S7 Adsorption Energy on Ni<sub>12</sub>P<sub>5</sub>(301) facet**

| position | adsorption energy (eV) | d (Ni-H) (Å) | d (P- H) (Å) |
|----------|------------------------|--------------|--------------|
| T1       | -0.426                 | 1.618        | 1.649        |
| T2       | -0.714                 | 1.701        | 1.725 1.741  |
| T3       | -0.537                 | 1.658        | 1.797        |
| B1       | -0.481                 | 1.756        | 1.737        |
| B2       | 0.159                  | 1.601        | 1.721        |
| H1       | -0.554                 | 1.614        | 1.653 2.904  |

**Fig. S14** (a) top-down view of the Ni<sub>12</sub>P<sub>5</sub> (301) and (b) possible adsorption sites of corresponding surface. Table S7. Adsorption energies and structure parameters for the hydrogen adsorption onto 5 Layer of Ni<sub>12</sub>P<sub>5</sub> (301).

**a**

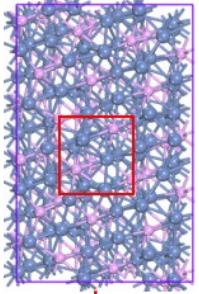

**b**



**Table S8 Adsorption Energy on Ni<sub>12</sub>P<sub>5</sub>(332) facet**

| position | adsorption energy (eV) | d (Ni-H) (Å) | d (P- H) (Å) |
|----------|------------------------|--------------|--------------|
| T1       | 0.567                  | 1.694        | 1.586        |
| T2       | 0.369                  | 1.643        | 1.635        |
| T3       | -0.244                 |              | 1.581        |
| B1       | 0.694                  | 1.590        | 1.735        |
| B2       | 0.698                  | 1.578        | 1.770        |
| H1       | 0.355                  | 1.481        | 3.476 2.710  |

**Fig. S15** (a) top-down view of the Ni<sub>12</sub>P<sub>5</sub> (332) and (b) possible adsorption sites of corresponding surface. Table S8. Adsorption energies and structure parameters for the hydrogen adsorption onto 5 Layer of Ni<sub>12</sub>P<sub>5</sub> (332).

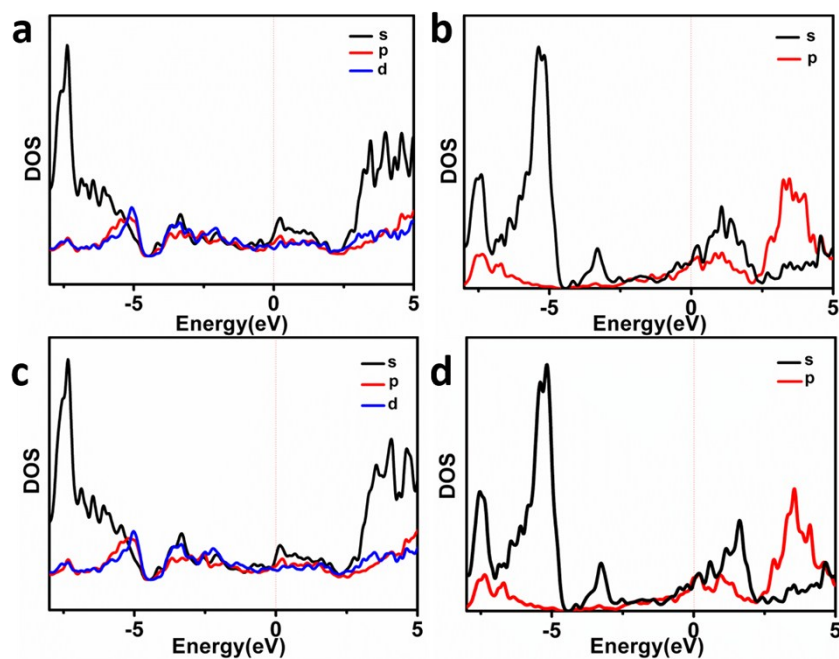

**Fig. S16** Projected density of states (PDOS) for (a) Ni and (b) P in  $\text{Ni}_{12}\text{P}_5$ , and (c) Ni and (d) P in Mo-doped  $\text{Ni}_{12}\text{P}_5$ .

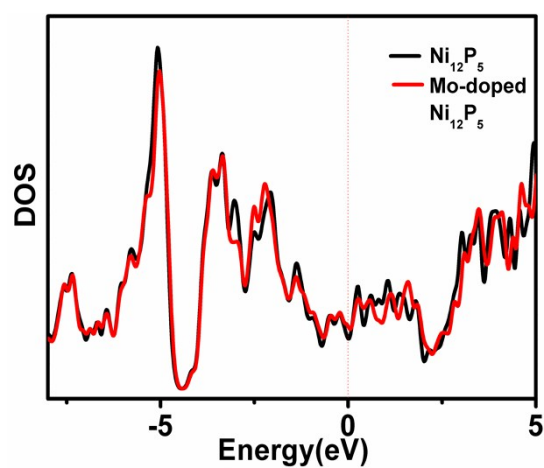

**Fig. S17** DOS of d band of  $\text{Ni}_{12}\text{P}_5$  and Mo-doped  $\text{Ni}_{12}\text{P}_5$ .
